# Supplementary material
Source: publisher figshare collection journal article supplement (https://frontiersin.figshare.com/ndownloader/files/10529881)
Supplement: Supplementary file [file 10529881]

**A**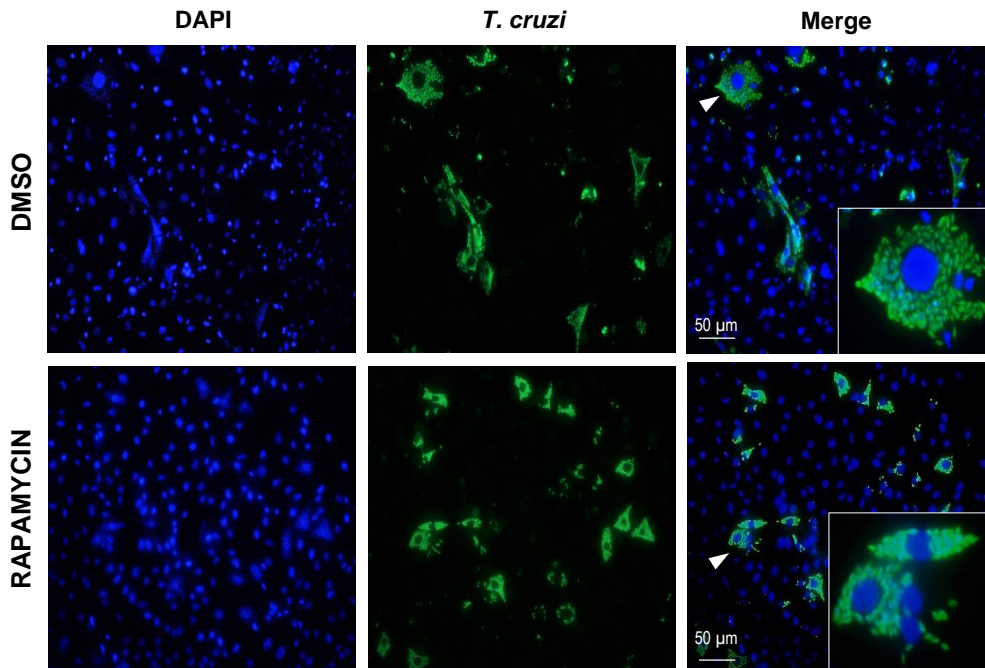**B**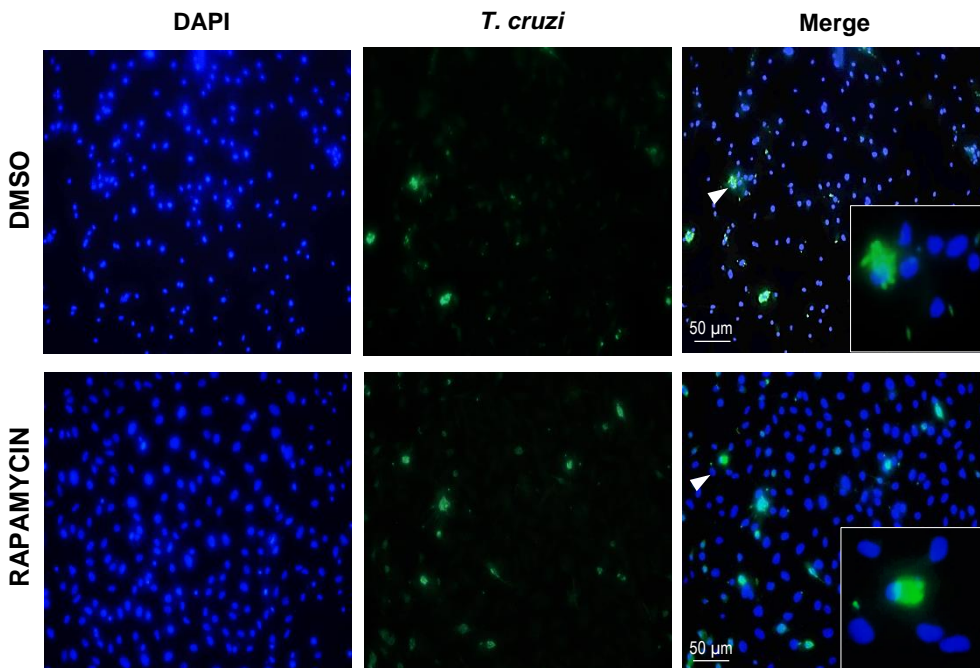

**Figure S3. Parasite load in BMDM from TNF $\alpha$ -R KO and IL-6 KO pretreated with Rapamycin.** Parasite replication in BMDM from TNF-R KO and IL-6 KO mice. BMDM were pretreated with DMSO as control or with Rapamycin (100 nM) during 90 min. After pretreatment BMDM were infected with *T. cruzi* trypomastigotes (1:5, cell:parasite ratio) during 24h. After that cells were washed and the number of intracellular parasite was analyzed by immunofluorescence 72 h later. A representative image from TNF-R KO (A) and IL-6 KO (B) BMDM, shown cell nucleus stained with DAPI and parasites in green. Inserts displayed an area at higher magnification (arrowhead) indicating infected macrophages.
